# Supplementary material
Source: PubMed Central journal article supplement (PMC2546913)

**Supplemental Figure 1**

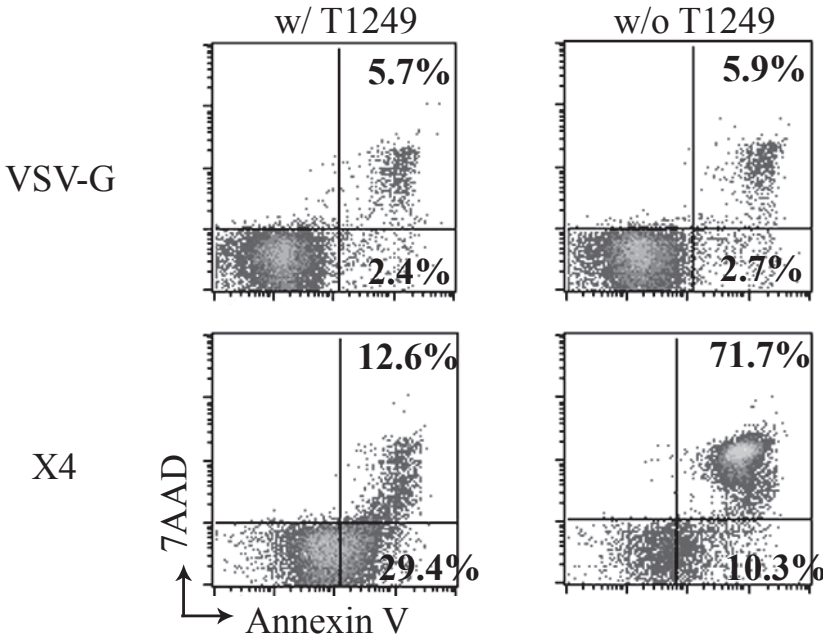

**Supplemental Figure 2**

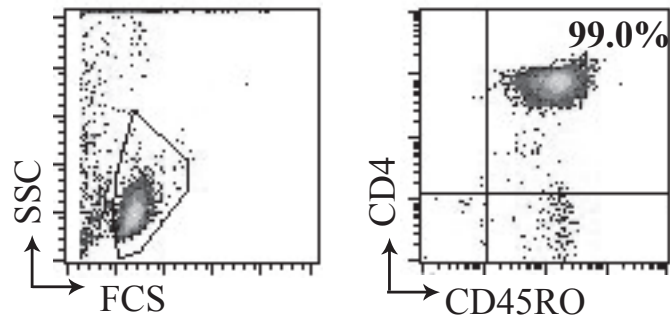

### Supplemental Figure 3

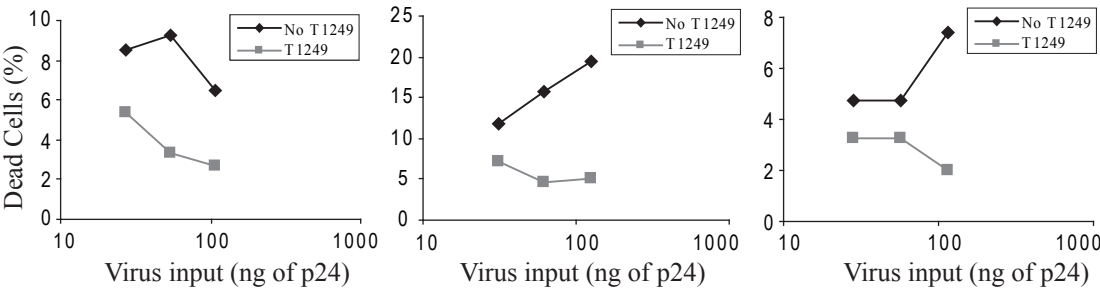

Supplement: supp_82_18_9154__1.pdf [file supp_82_18_9154__1.pdf]
